# Supplementary material for: Structure-based design of a strain transcending AMA1-RON2L malaria vaccine
Source: PubMed Central journal article supplement (PMC10475129; doi:10.1038/s41467-023-40878-7), 2023-09-02
Supplement: 41467_2023_40878_MOESM1_ESM.pdf [file 41467_2023_40878_MOESM1_ESM.pdf]

**Supplementary Information for:**

**Structure-based design of a strain transcending AMA1-RON2L malaria vaccine**

Palak N. Patel<sup>1</sup>, Thayne H. Dickey<sup>1</sup>, Ababacar Diouf<sup>2</sup>, Nichole D. Salinas<sup>1</sup>, Holly McAleese<sup>3</sup>, Tarik Ouahes<sup>3</sup>, Carole A. Long<sup>2</sup>, Kazutoyo Miura<sup>2</sup>, Lynn E. Lambert<sup>3</sup>, Niraj H. Tolia<sup>1\*</sup>

<sup>1</sup>Host-Pathogen Interactions and Structural Vaccinology Section, Laboratory of Malaria Immunology and Vaccinology, National Institute of Allergy and Infectious Diseases, National Institutes of Health, Bethesda, MD, USA

<sup>2</sup>Laboratory of Malaria and Vector Research, National Institute of Allergy and Infectious Diseases, National Institutes of Health, Rockville, MD, USA

<sup>3</sup> Vaccine Development Unit, Laboratory of Malaria Immunology and Vaccinology, National Institute of Allergy and Infectious Diseases, National Institutes of Health, Bethesda, MD, USA

\*Corresponding author:

[niraj.tolia@nih.gov](mailto:niraj.tolia@nih.gov)

9000 Rockville Pike, Building 29B, 4NN08

Bethesda, MD, 20892

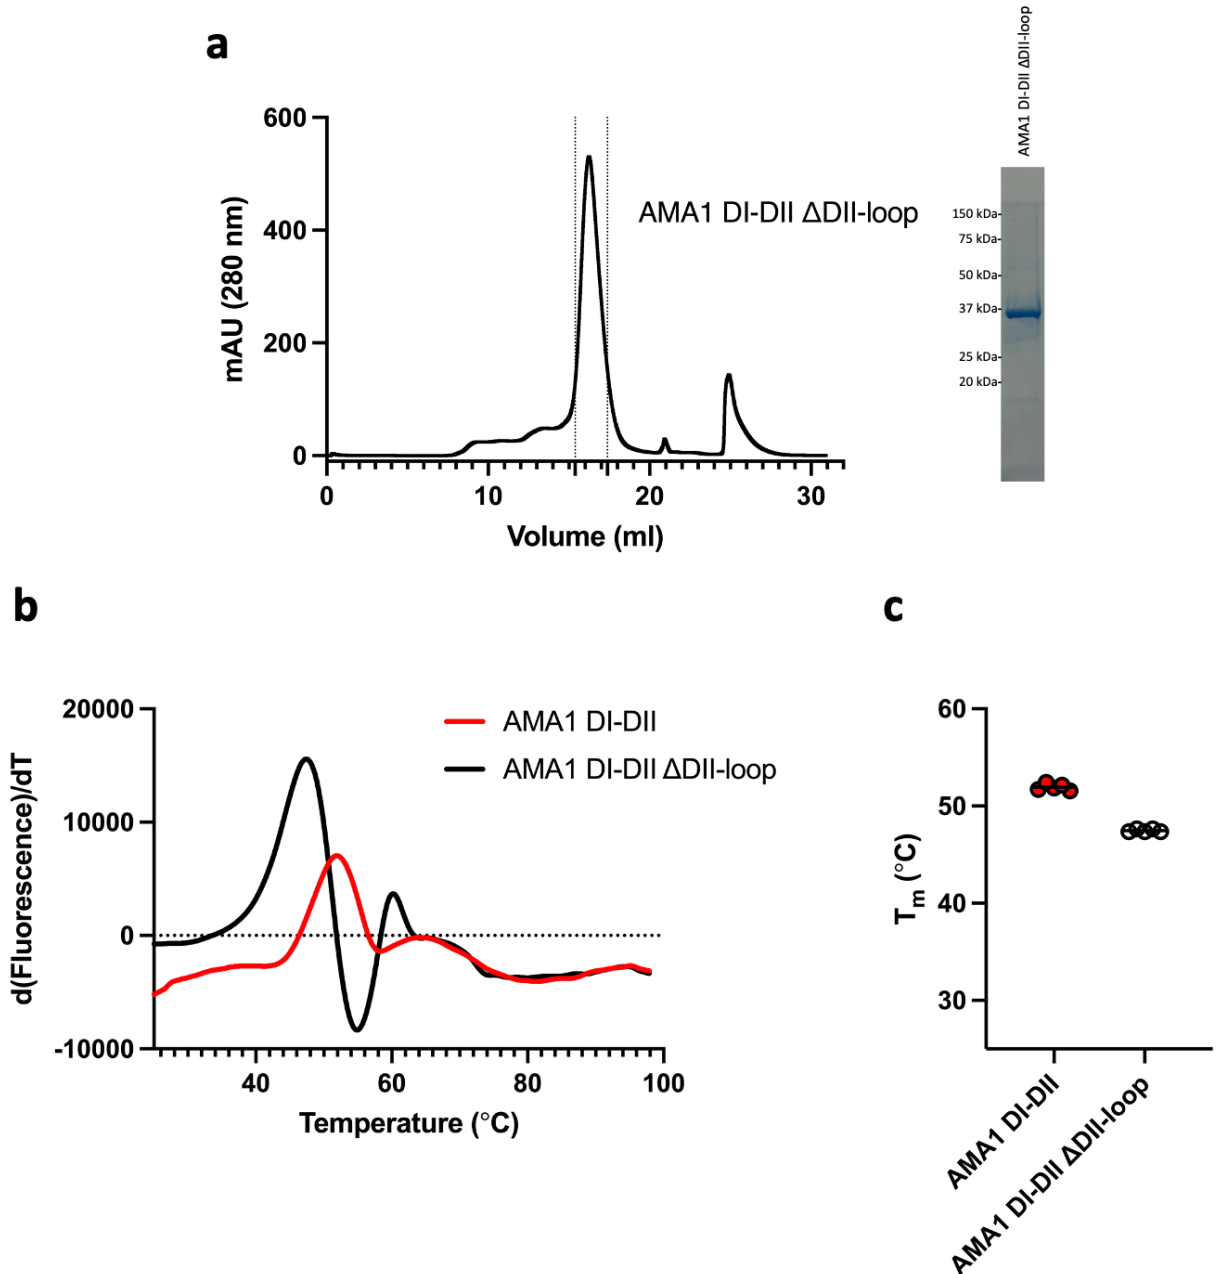

**Supplementary Fig. 1: Purification and characterization of the AMA1 DI-DII  $\Delta$ DII-loop.** **a** Size exclusion chromatography (SEC) profile of the AMA1 DI-DII  $\Delta$ DII-loop. The peak for the AMA1 DI-DII  $\Delta$ DII-loop is shown between two dotted lines. Inset shows Coomassie Brilliant Blue-stained SDS-PAGE gel for AMA1 DI-DII  $\Delta$ DII-loop (35.4-kDa) under reducing condition. **b** Differential scanning fluorimetry indicated that deletion of DII loop does not improve the stability of engineered AMA1 DI-DII. **c**  $T_m$  from five independent measurements. Bar represents mean. Source data are provided as a Source data file.

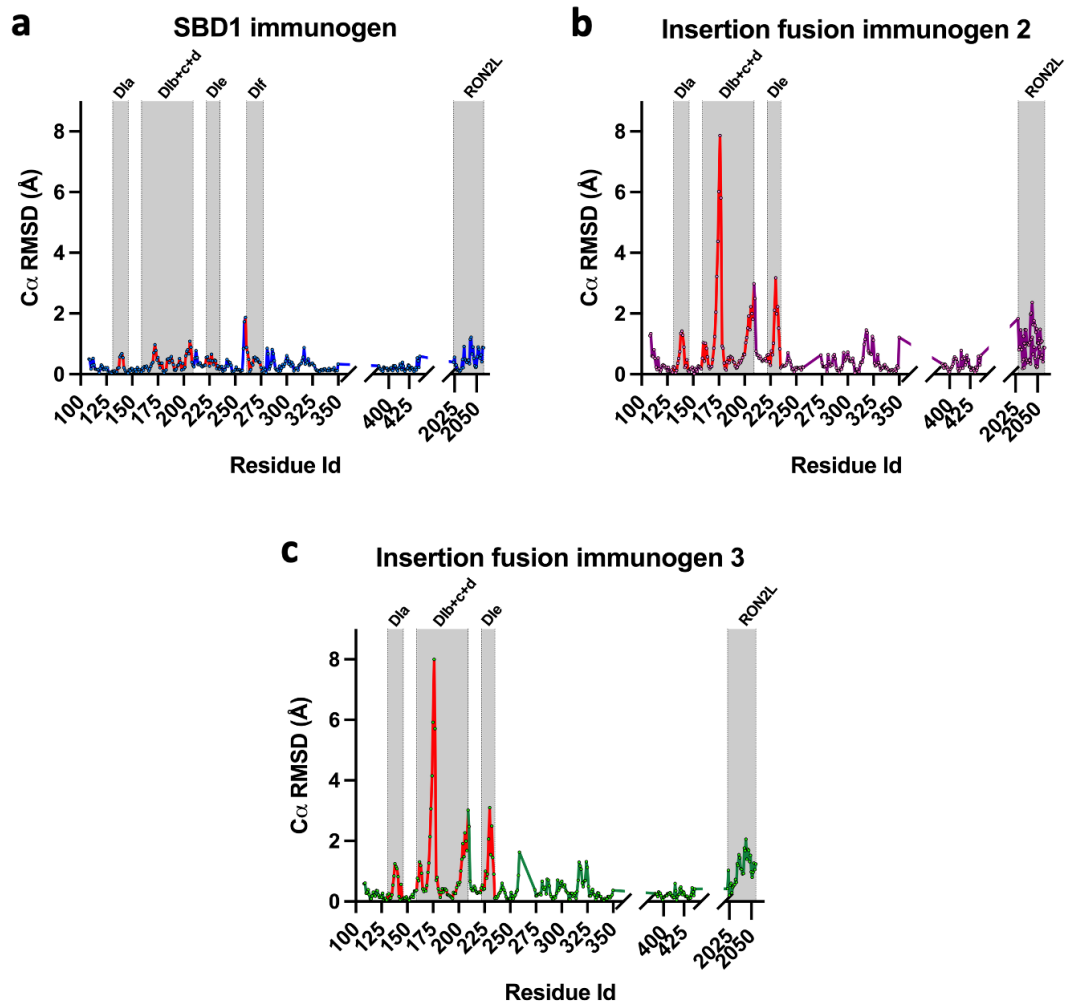

**Supplementary Fig. 2: SBD1 immunogen possesses the greatest structural similarity to the AMA1-RON2L complex.** The root-mean-square deviation (RMSD) for the  $C\alpha$  atom of each residue in the **a** SBD1 immunogen, **b** Insertion fusion immunogen 2, and **c** Insertion fusion immunogen 3, when aligned to the AMA1 DI-DII-RON2L complex (PDB ID: 3zwz, <https://www.rcsb.org/structure/3ZWZ>). The residues are labeled based on the wildtype AMA1 and RON2 sequence numbering. The domain I loops are indicated by red lines and silver shades beneath the corresponding data points. Source data are provided as a Source data file.

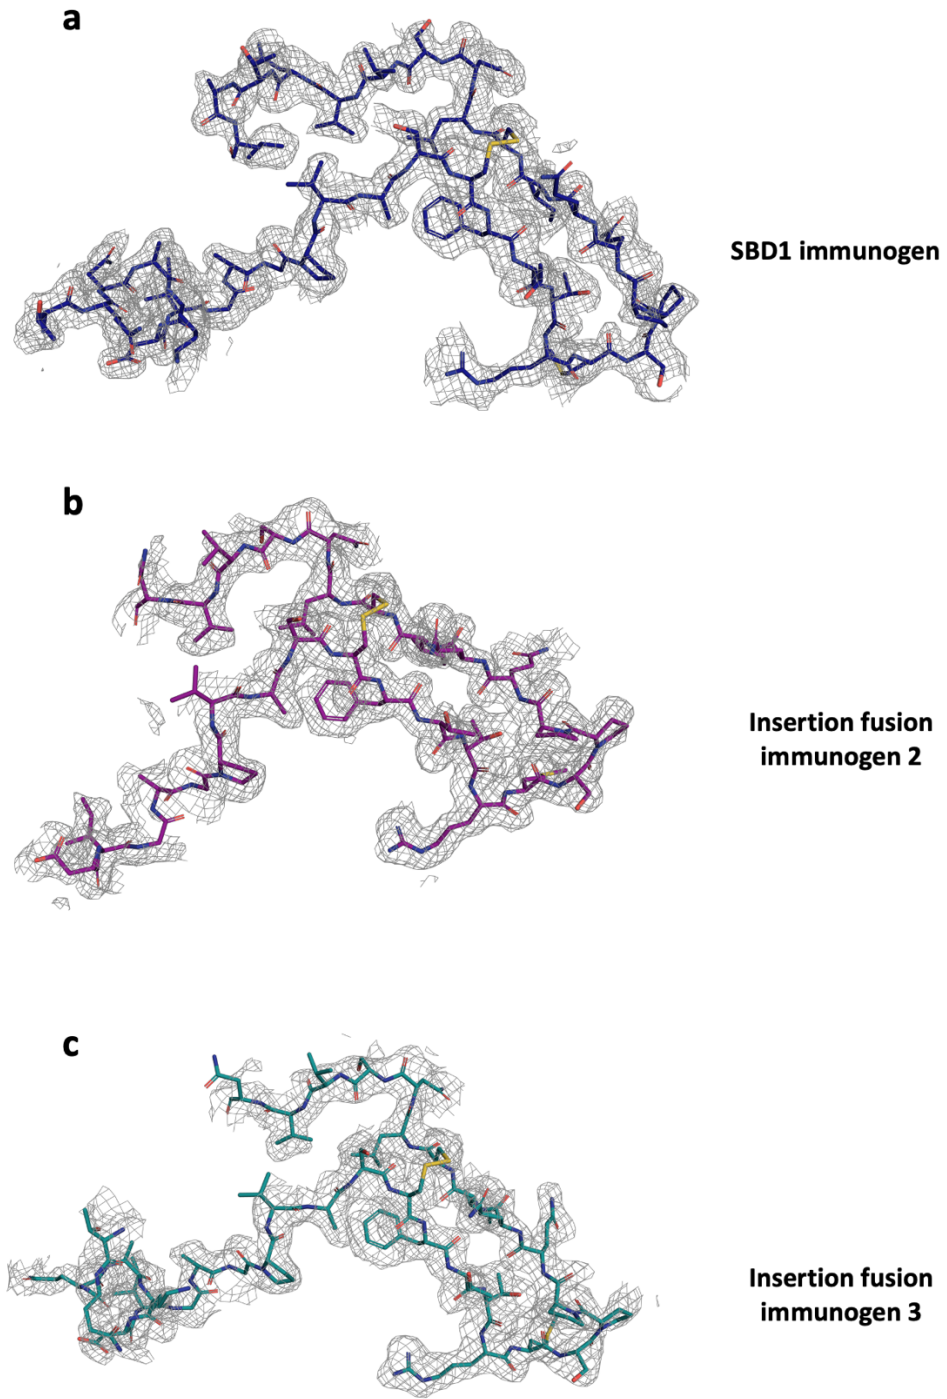

**Supplementary Fig. 3: RON2L of single-component immunogens shows a disulfide-anchored U-shaped conformation in the hydrophobic groove of AMA1. Electron density for the RON2L component of **a** SBD1 immunogen, **b** Insertion fusion immunogen 2, and **c** Insertion fusion immunogen 3 from a Polder map (gray mesh) contoured at 1.0  $\sigma$  level (1.43 rmsd).**

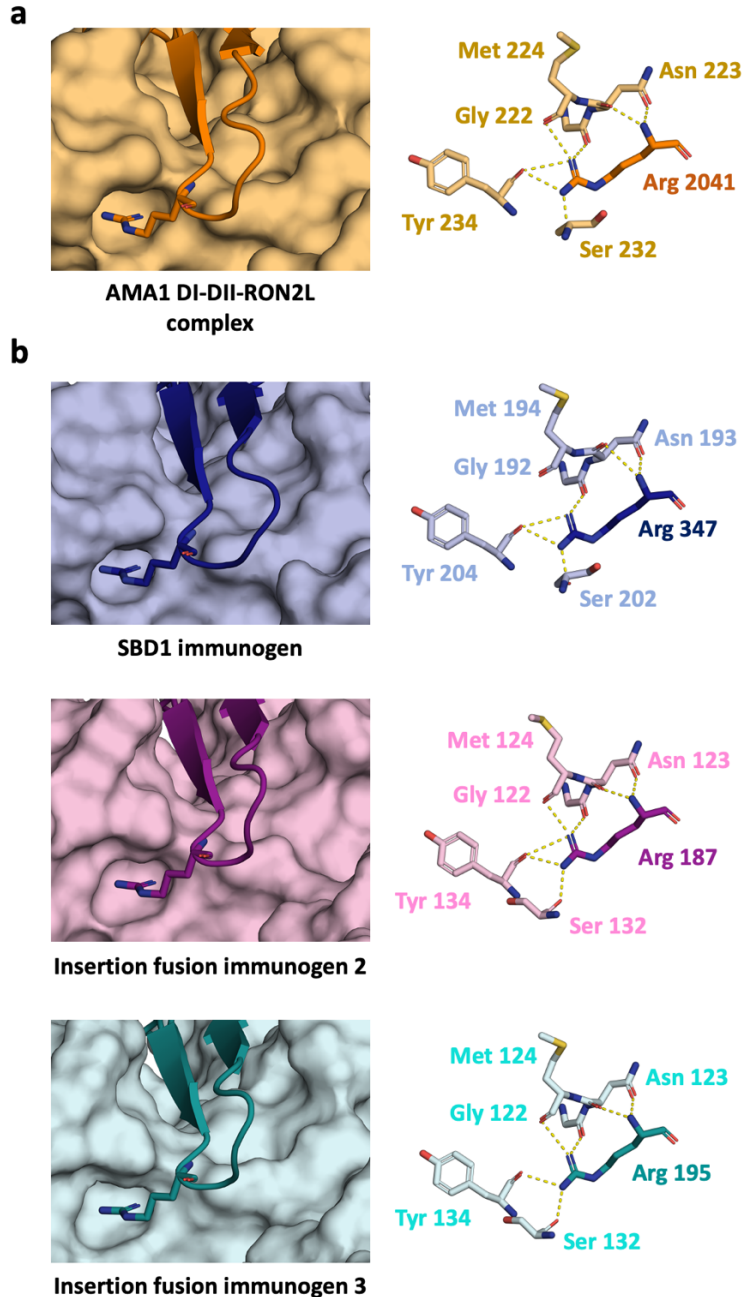

**Supplementary Fig. 4: An influential residue, Arg2041, is located at the tip of the  $\beta$ -hairpin and with its guanidyl group is adequately positioned within the preformed pocket of AMA1. As in **a** AMA1 DI-DII-RON2L complex structure (PDB ID: 3zwz, <https://www.rcsb.org/structure/3ZWZ>), the Arg residue of RON2L of **b** all three single-component immunogens fits snugly into a deep pocket in the surface of AMA1. The complex network of hydrogen bonds stabilizes this structure.**

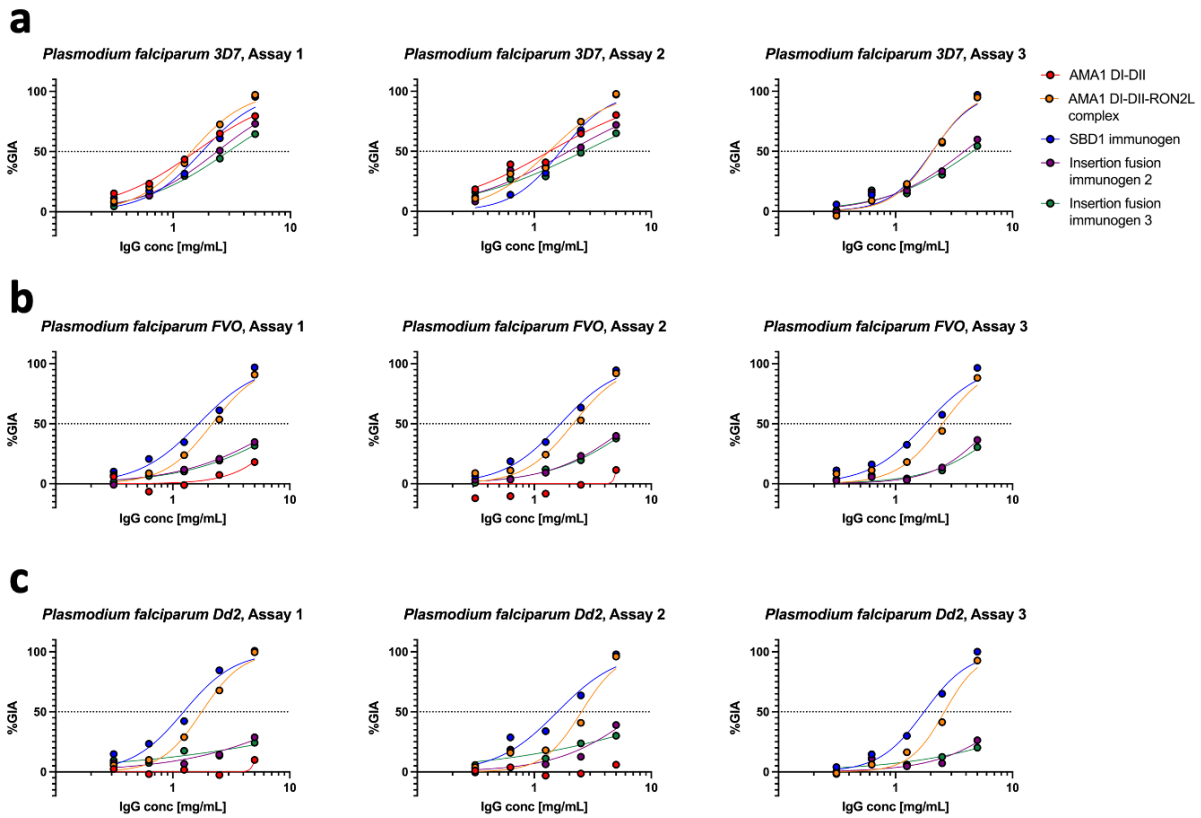

**Supplementary Fig. 5: *In vitro* GIA dilution series of pooled purified IgG from each group at day 63 against *Plasmodium falciparum* a 3D7 b FVO c Dd2. Data from individual assays are shown. IC<sub>50</sub> values were determined by interpolation after fitting data to a four-parameter dose-response curve. IgG from AMA1 DI-DII IgG group was not tested in Assay 3 for each strain. Source data are provided as a Source data file.**

a

```

                                D1a loop
                                (Leu131-Ser146)
                                D1b loop
                                (Glu159-Ala182)
AMA1DI-DII-Pf3D7  NYMGNPWTEYMAKYDIEEVHSGSIRVDLGEDAEVAGTQYRLPSGKCPVFGKGIIEENSNTTFLTPVATGNQYLKD
AMA1DI-DII-PfFVO  NYMGNPWTEYMAKYDIEEVHSGSIRVDLGEDAEVAGTQYRLPSGKCPVFGKGIIEENSNTTFLKPVATGNQDLKD
AMA1DI-DII-PfDd2  NYMGNPWTEYMAKYDIEEVHSGSIRVDLGEDAEVAGTQYRLPSGKCPVFGKGIIEENSNTTFLTPVATGNQYLKD
*****:*****:*****:*****:*****:*****:*****:*****:*****:*****:*****:*****

                                D1c loop
                                (Phe183-Pro192)
                                D1d loop
                                (Thr194-Lys209)
                                D1e loop
                                (Gly222-Lys235)
AMA1DI-DII-Pf3D7  GGFAPFPTEPLMSPMTLDEMRHFYKDNKYVKNLDELTLCSRHAGNMI PDNDKNSNYKYPVYDDKDKKCHILYIA
AMA1DI-DII-PfFVO  GGFAPFPPTNPLISPMTLNGMRDFYKNEYVKNLDELTLCSRHAGNMNPDNDKNSNYKYPVYDYNDKKCHILYIA
AMA1DI-DII-PfDd2  GGFAPFPPTKPLMSPMTLDDMRLLYKDNEDVKNLDELTLCSRHAGNMNPDNDKNSNYKYPVYDYNDKKCHILYIA
*****:*****:*****:*****:*****:*****:*****:*****:*****:*****:*****:*****

                                D1f loop
                                (Arg261-Arg277)
AMA1DI-DII-Pf3D7  AQENNGPRYCNKDESKRNSMFCFRPAKDISFQNYTYLSKNVVDNWEKVCPRKNLQNAKFLWVDGNCEDIPHVNE
AMA1DI-DII-PfFVO  AQENNGPRYCNKQSKRNSMFCFRPAKDLFENYTYLSKNVVDNWEVVCPRKNLENAKFLWVDGNCEDIPHVNE
AMA1DI-DII-PfDd2  AQENNGPRYCNKDESKRNSMFCFRPAKDSFQNYTYLSKNVVDNWEVVCPRKNLENAKFLWVDGNCEDIPHVNE
*****:*****:*****:*****:*****:*****:*****:*****:*****:*****:*****:*****

AMA1DI-DII-Pf3D7  FPAIDLFECNKLVEFELSASDQPKQYEQHLDTYEKIKEGFKNKNASMIKSAFLPTGAFKADRYKSHGKGYNWGNYN
AMA1DI-DII-PfFVO  FSANDLFECNKLVEFELSASDQPKQYEQHLDTYEKIKEGFKNKNASMIKSAFLPTGAFKADRYKSHGKGYNWGNYN
AMA1DI-DII-PfDd2  FSANDLFECNKLVEFELSASDQPKQYEQHLDTYEKIKEGFKNKNASMIKSAFLPTGAFKADRYKSHGKGYNWGNYN
*.* *****:*****:*****:*****:*****:*****:*****:*****:*****:*****:*****:*****

AMA1DI-DII-Pf3D7  TETQKCEIFNVKPTCLINSSYIATTALSHPIEVE
AMA1DI-DII-PfFVO  RETQKCEIFNVKPTCLINSSYIATTALSHPIEVE
AMA1DI-DII-PfDd2  RKTQKCEIFNVKPTCLINSSYIATTALSHPIEVE
:*****:*****:*****:*****:*****:*****:*****:*****:*****:*****:*****

```

b

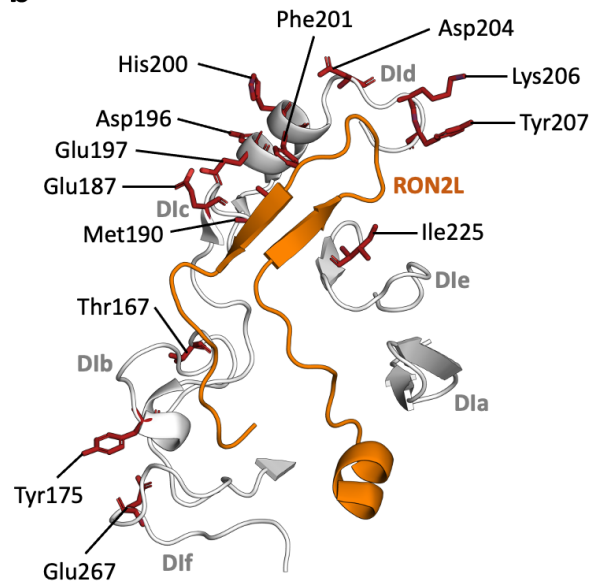

Supplementary Fig. 6: Immunization with the SBD1 immunogen induces higher levels of broadly neutralizing antibodies potentially by targeting new functional regions on AMA1 including conserved domain I loops. a Sequence alignment of AMA1 DI-DII from *Plasmodium falciparum* 3D7, FVO, and Dd2 strains. Polymorphic residues, which vary between the strains, are marked in bold red. Residues within the

AMA1 domain I loops surrounding the RON2L binding site, in the presence of RON2L, are marked in bold and labeled. The multiple sequence alignments were generated using the Clustal Omega/TCoffee. **b** Polymorphic residues mapped onto the AMA1 domain I loops surrounding the RON2L binding site in the presence of RON2L (PDB ID: 3zwz, <https://www.rcsb.org/structure/3ZWZ>). The polymorphic residues are depicted as red sticks, indicating their positions within the AMA1 domain I loops. The AMA1 loops are represented as a white cartoon (labeled DIa, DIb, DIc, DId, DIe, and DIf loops). The RON2L is depicted as an orange cartoon.



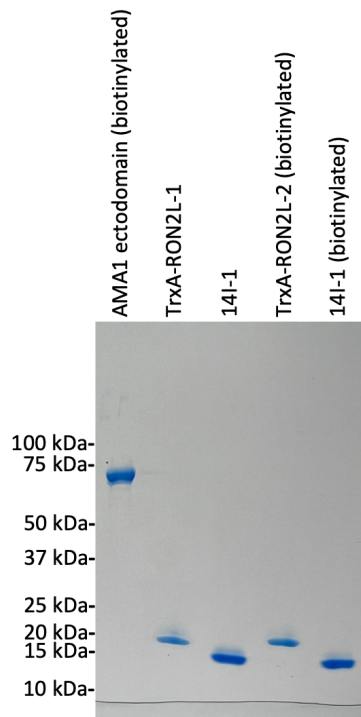

**Supplementary Fig. 7:** Coomassie Brilliant Blue-stained SDS-PAGE gel for AMA1 ectodomain (biotinylated, 63.8-kDa), TrxA-RON2L-1 (18.1-kDa), IgNAR 14I-1 (14.2-kDa), TrxA-RON2L-2 (biotinylated, 20.2-kDa) and IgNAR 14I-1 (biotinylated, 16.7-kDa) under reducing condition. Source data are provided as a Source data file.

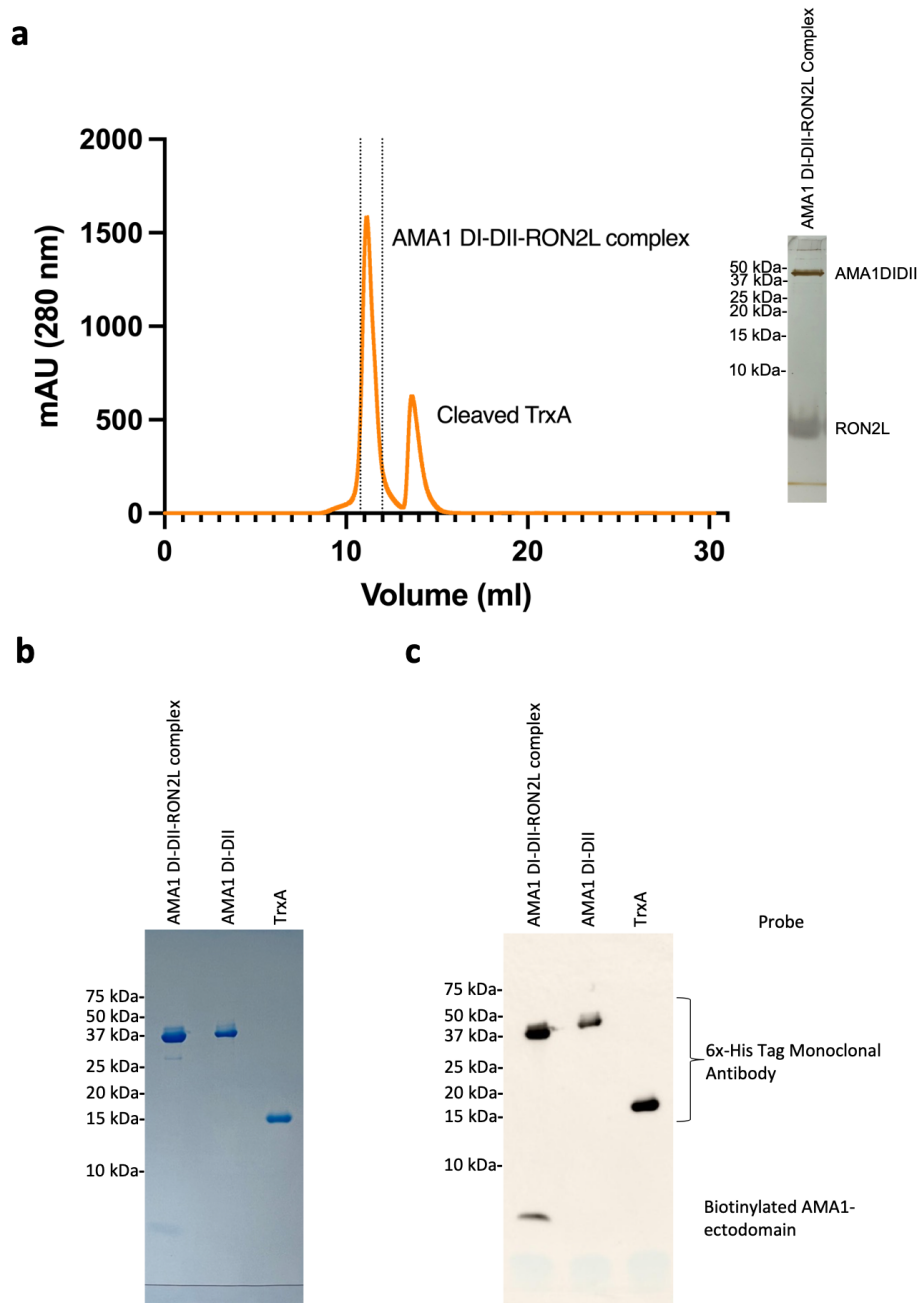

**Supplementary Fig. 8: Purification and characterization of the AMA1 DI-DII-RON2L complex.** **a** Size exclusion chromatography (SEC) profile of the AMA1 DI-DII-RON2L complex. The peak for the AMA1 DI-DII-RON2L complex is shown between two dotted lines. A second peak corresponds to cleaved TrxA (6x-His tagged). Inset shows silver-stained SDS-PAGE gel for AMA1 DI-DII (39.2-kDa) and RON2L (4.2-kDa) components of complex under reducing condition. **b** Coomassie Brilliant Blue-stained SDS-PAGE gel for AMA1 DI-DII and RON2L components of complex under non-reducing condition. **c**

Western blot for the AMA1 DI-DII and RON2L components of complex is depicted, along with the primary probe used. AMA1 DI-DII (39.2-kDa) and TrxA (14.73-kDa) were used as controls under non-reducing condition. Source data are provided as a Source data file.

**Supplementary Table 1: Sequences of immunogens and constructs used in the study after signal peptide cleavage. Cloning scars, tags, and linkers are shown in lowercase.**

| Name                                | Sequence                                                                                                                                                                                                                                                                                                                                                                                                                                                                                                                                                                                                 |
|-------------------------------------|----------------------------------------------------------------------------------------------------------------------------------------------------------------------------------------------------------------------------------------------------------------------------------------------------------------------------------------------------------------------------------------------------------------------------------------------------------------------------------------------------------------------------------------------------------------------------------------------------------|
| <b>Native AMA1 DI-DII</b>           | etgNYMGNPWTEYMAKYDIEEVHGSGIRVDLGEDA EVAGTQYRLPSGKCPVFGKGIIIENSNTAFLTPVA<br>TGNQYLKDGGFAPPTEPLMSPMTLDEMRHFYKDNKYVKNLDELTLCSRHAGNMIPDNDKNSNYKYP<br>AVYDDKDKKCHILYIAAQENNGPRYCNKDESKRNSMFCFRPAKDISFQNYAYLSKNVVDNWEKVCPRK<br>NLQNAKFGLWVDGNCE DIPHVNEFPAILDFECNKL VFELSASDQPKQYE QHLTDYEKIKEGFKNKNA<br>MIKSAFLPTGAFKADRYKSHGKGYNWGNYNTE TQKCEIFNVKPTCLINNAAYIATTALSHPIEVEgtkhhhh<br>hh                                                                                                                                                                                                                       |
| <b>AMA1 DI-DII ΔDII-loop</b>        | etgNYMGNPWTEYMAKYDIEEVHGSGIRVDLGEDA EVAGTQYRLPSGKCPVFGKGIIIENSNTAFLTPVA<br>TGNQYLKDGGFAPPTEPLMSPMTLDEMRHFYKDNKYVKNLDELTLCSRHAGNMIPDNDKNSNYKYP<br>AVYDDKDKKCHILYIAAQENNGPRYCNKDESKRNSMFCFRPAKDISFQNYAYLSKNVVDNWEKVCPRK<br>NLQNAKFGLWVDGNCE DIPHVNEFPAILDFECNKL VFELSASDQPGGSGYKSHGKGYNWGNYNTE TQ<br>KCEIFNVKPTCLINNAAYIATTALSHPIEVEgtkhhhhhh                                                                                                                                                                                                                                                              |
| <b>SBD1 immunogen</b>               | etgKADRYKSHGKGYNWGNYNTE TQKCEIFNVKPTCLINNAAYIATTALSHPIEVEggggsgggsgggsggg<br>gsNYMGNPWTEYMAKYDIEEVHGSGIRVDLGEDA EVAGTQYRLPSGKCPVFGKGIIIENSNTAFLTPVA<br>TGNQYLKDGGFAPPTEPLMSPMTLDEMRHFYKDNKYVKNLDELTLCSRHAGNMIPDNDKNSNYKYP<br>AVYDDKDKKCHILYIAAQENNGPRYCNKDESKRNSMFCFRPAKDISFQNYAYLSKNVVDNWEKVCPRK<br>NLQNAKFGLWVDGNCE DIPHVNEFPAILDFECNKL VFELSASDQPKQYE QHLTTQAKDIGAGPVASC<br>FTRMSPPQQICLNSVNTALSgtkhhhhhh                                                                                                                                                                                             |
| <b>Insertion fusion immunogen 2</b> | etgNYMGNPWTEYMAKYDIEEVHGSGIRVDLGEDA EVAGTQYRLPSGKCPVFGKGIIIENSNTAFLTPVA<br>TGNQYLKDGGFAPPTEPLMSPMTLDEMRHFYKDNKYVKNLDELTLCSRHAGNMIPDNDKNSNYKYP<br>AVYDDKDKKCHILYIAAQENNGggggsgsDITQQA KDIGAGPVASCFTTRMSPPQQICLNSVNTALSggsg<br>MFCFRPAKDISFQNYAYLSKNVVDNWEKVCPRK NLQNAKFGLWVDGNCE DIPHVNEFPAILDFECNKL<br>VFELSASDQPGggsgYKSHGKGYNWGNYNTE TQKCEIFNVKPTCLINNAAYIATTALSHPIEVEgtkhhhhhh                                                                                                                                                                                                                        |
| <b>Insertion fusion immunogen 3</b> | etgNYMGNPWTEYMAKYDIEEVHGSGIRVDLGEDA EVAGTQYRLPSGKCPVFGKGIIIENSNTAFLTPVA<br>TGNQYLKDGGFAPPTEPLMSPMTLDEMRHFYKDNKYVKNLDELTLCSRHAGNMIPDNDKNSNYKYP<br>AVYDDKDKKCHILYIAAQENNGPRYCN GggsgggsgsDITQQA KDIGAGPVASCFTTRMSPPQQICLNSV<br>NTALSggsgMFCFRPAKDISFQNYAYLSKNVVDNWEKVCPRK NLQNAKFGLWVDGNCE DIPHVNEFP<br>AILDFECNKL VFELSASDQPGggsgYKSHGKGYNWGNYNTE TQKCEIFNVKPTCLINNAAYIATTALSHPIEVE<br>gtkhhhhhh                                                                                                                                                                                                          |
| <b>AMA1 ectodomain</b>              | etgQNYWEHPYQNSDVYRPIHEHREHPKEYEYPLHQEHTYQQEDSGEDENTLQHA YPIDHEGAEPAPQ<br>EQNL FSSIEIVERSNYMGNPWTEYMAKYDIEEVHGSGIRVDLGEDA EVAGTQYRLPSGKCPVFGKGIII<br>NSNTTFLTPVATGNQYLKDGGFAPPTEPLMSPMTLDEMRHFYKDNKYVKNLDELTLCSRHAGNMIPD<br>NDKNSNYKYP AVYDDKDKKCHILYIAAQENNGPRYCNKDESKRNSMFCFRPAKDISFQNYTYLSKNV<br>DNWEKVCPRK NLQNAKFGLWVDGNCE DIPHVNEFPAILDFECNKL VFELSASDQPKQYE QHLTDYEK<br>IKEGFKNKNA MIKSAFLPTGAFKADRYKSHGKGYNWGNYNTE TQKCEIFNVKPTCLINNSSYIATTALS<br>HPIEVENNFPCSLYKDEIMKEIERESKRILNDNDDEGNKKIAPRIFISDDKDSLKCPCDPEMVSNSTCR<br>FFVCKCVERRAEVT SNNEVVVKEYKDEYADIPEHKPTgtggsgsgIndifeaqkiewhegrtkhhhhhh |
| <b>TrxA-ROn2L-1</b>                 | etghhhhhMSDKIHLTDDSFDTDLVKADGAILVDFWAEWCGPCKMIAPILDEIADEYQGKLTVAKL NIDQ<br>NPGTAPKYGIRGIPTLLLFKNGEVAATKV GALSkgqlKEFLDANLAGSGSlevlfqgpDITQQA KDIGAGPVAS<br>CFTTRMSPPQQICLNSVNTALS                                                                                                                                                                                                                                                                                                                                                                                                                        |
| <b>TrxA-ROn2L-2</b>                 | etghhhhhMSDKIHLTDDSFDTDLVKADGAILVDFWAEWCGPCKMIAPILDEIADEYQGKLTVAKL NIDQ<br>NPGTAPKYGIRGIPTLLLFKNGEVAATKV GALSkgqlKEFLDANLAGSGSLEVLFQGPDITQQA KDIGAG<br>PVASCFTTRMSPPQQICLNSVNTALSgsgsgIndifeaqkiewhe                                                                                                                                                                                                                                                                                                                                                                                                     |
| <b>TrxA</b>                         | etghhhhhMSDKIHLTDDSFDTDLVKADGAILVDFWAEWCGPCKMIAPILDEIADEYQGKLTVAKL NIDQ<br>NPGTAPKYGIRGIPTLLLFKNGEVAATKV GALSkgqlKEFLDANLAGSGSgIndifeaqkiewhe                                                                                                                                                                                                                                                                                                                                                                                                                                                            |
| <b>14I-1</b>                        | etgAWVDQTPRTATKETGESLTINCVL RDASLELKD TGWYRTKLGSTNEQSISIGGRYVETVNKGSKSF<br>S LRISDLRVEDSGTYKCAFYS LPLRDYNYALLFRGEKGAGTALTVKAAAgtkhhhhhh                                                                                                                                                                                                                                                                                                                                                                                                                                                                  |
| <b>14I-1 (biotinylated)</b>         | etgAWVDQTPRTATKETGESLTINCVL RDASLELKD TGWYRTKLGSTNEQSISIGGRYVETVNKGSKSF<br>S LRISDLRVEDSGTYKCAFYS LPLRDYNYALLFRGEKGAGTALTVKAAAgtgsgsgIndifeaqkiewhegrtk<br>hhhh                                                                                                                                                                                                                                                                                                                                                                                                                                          |

**Supplementary Table 2: Contact residues between RON2L and AMA1 residues for SBD1 immunogen.**

| Residues in RON2L | Residues in RON2L (Numbered according to PDB ID:3ZWZ) | Interface with AMA1 (PDB ID: 3ZWZ) | Residues in RON2L (SBD1 immunogen) | Interface with AMA1 (SBD1 immunogen) | Interface with AMA1 (SBD1 immunogen, numbered according to PDB ID:3ZWZ) |
|-------------------|-------------------------------------------------------|------------------------------------|------------------------------------|--------------------------------------|-------------------------------------------------------------------------|
| Thr3              | Thr2023                                               | Leu131                             | Thr329                             | Leu101                               | Leu131                                                                  |
| Gln4              | Gln2024                                               | Val137                             | Gln330                             | Val107                               | Val137                                                                  |
| Gln5              | Gln2025                                               | Thr140                             | Gln331                             | Thr110                               | Thr140                                                                  |
| Ala6              | Ala2026                                               | Gln141                             | Ala332                             | Gln111                               | Gln141                                                                  |
| Lys7              | Lys2027                                               | Tyr142                             | Lys333                             | Tyr112                               | Tyr142                                                                  |
| Asp8              | Asp2028                                               | Arg143                             | Asp334                             | Arg113                               | Arg143                                                                  |
| Ile9              | Ile2029                                               | Val169                             | Ile335                             | Val139                               | Val169                                                                  |
| Gly10             | Gly2030                                               | Ala170                             | Gly336                             | Ala140                               | Ala170                                                                  |
| Ala11             | Ala2031                                               | Thr171                             | Ala337                             | Thr141                               | Thr171                                                                  |
| Gly12             | Gly2032                                               | Gly172                             | Gly338                             | Gly142                               | Gly172                                                                  |
| Pro13             | Pro2033                                               | Gln174                             | Pro339                             | Gln144                               | Gln174                                                                  |
| Val14             | Val2034                                               | Leu176                             | Val340                             | Tyr145                               | Tyr175                                                                  |
| Ala15             | Ala2035                                               | Phe183                             | Ala341                             | Leu146                               | Leu176                                                                  |
| Ser16             | Ser2036                                               | Pro184                             | Ser342                             | Phe153                               | Phe183                                                                  |
| Cys17             | Cys2037                                               | Pro185                             | Cys343                             | Pro154                               | Pro184                                                                  |
| Phe18             | Phe2038                                               | Thr186                             | Phe344                             | Pro155                               | Pro185                                                                  |
| Thr19             | Thr2039                                               | Glu187                             | Thr345                             | Thr156                               | Thr186                                                                  |
| Thr20             | Thr2040                                               | Pro188                             | Thr346                             | Glu157                               | Glu187                                                                  |
| Arg21             | Arg2041                                               | Met190                             | Arg347                             | Pro158                               | Pro188                                                                  |
| Met22             | Met2042                                               | Phe201                             | Met348                             | Met160                               | Met190                                                                  |
| Ser23             | Ser2043                                               | Tyr202                             | Ser349                             | Phe171                               | Phe201                                                                  |
| Pro24             | Pro2044                                               | Asn205                             | Pro350                             | Tyr172                               | Tyr202                                                                  |
| Pro25             | Pro2045                                               | Val208                             | Pro351                             | Asn175                               | Asn205                                                                  |
| Gln26             | Gln2046                                               | Arg219                             | Gln352                             | Val178                               | Val208                                                                  |
| Gln27             | Gln2047                                               | Gly222                             | Gln353                             | Arg189                               | Arg219                                                                  |
| Ile28             | Ile2048                                               | Asn223                             | Ile354                             | Gly192                               | Gly222                                                                  |
| Cys29             | Cys2049                                               | Met224                             | Cys355                             | Asn193                               | Asn223                                                                  |
| Leu30             | Leu2050                                               | Ile225                             | Leu356                             | Met194                               | Met224                                                                  |
| Asn31             | Asn2051                                               | Pro226                             | Asn357                             | Ile195                               | Ile225                                                                  |
| Ser32             | Ser2052                                               | Asp227                             | Ser358                             | Pro196                               | Pro226                                                                  |
| Val33             | Val2053                                               | Asn228                             | Val359                             | Asp197                               | Asp227                                                                  |
| Val34             | Val2054                                               | Ser232                             | Val360                             | Asn198                               | Asn228                                                                  |
| Asn35             | Asn2055                                               | Tyr234                             | Asn361                             | Ser202                               | Ser232                                                                  |
| Thr36             | Thr2056                                               | Lys235                             | Thr362                             | Tyr204                               | Tyr234                                                                  |
| Ala37             | Ala2057                                               | Tyr236                             | Ala363                             | Lys205                               | Lys235                                                                  |
| Leu38             | Leu2058                                               | Tyr251                             | Leu364                             | Tyr206                               | Tyr236                                                                  |
|                   |                                                       | Ile252                             |                                    | Tyr221                               | Tyr251                                                                  |
|                   |                                                       | Ala253                             |                                    | Ile222                               | Ile252                                                                  |
|                   |                                                       | Ala254                             |                                    | Ala223                               | Ala253                                                                  |
|                   |                                                       | Gln255                             |                                    | Ala224                               | Ala254                                                                  |
|                   |                                                       | Glu256                             |                                    | Gln225                               | Gln255                                                                  |
|                   |                                                       | Asn257                             |                                    | Glu226                               | Glu256                                                                  |
|                   |                                                       | Tyr262                             |                                    | Asn227                               | Asn257                                                                  |
|                   |                                                       | Asn271                             |                                    | Tyr232                               | Tyr262                                                                  |
|                   |                                                       | Met273                             |                                    | Asn241                               | Asn271                                                                  |
|                   |                                                       | Phe274                             |                                    | Met243                               | Met273                                                                  |
|                   |                                                       | Phe276                             |                                    | Phe244                               | Phe274                                                                  |
|                   |                                                       | Gln349                             |                                    | Phe246                               | Phe276                                                                  |
|                   |                                                       | Pro350                             |                                    | Gln319                               | Gln349                                                                  |
|                   |                                                       | Arg389                             |                                    | Pro320                               | Pro350                                                                  |
|                   |                                                       | Tyr390                             |                                    | Gln325                               | Gln355                                                                  |
|                   |                                                       |                                    |                                    | Leu327                               | Leu357                                                                  |
|                   |                                                       |                                    |                                    | Thr328                               | Thr358                                                                  |
|                   |                                                       |                                    |                                    | Arg4                                 | Arg389                                                                  |
|                   |                                                       |                                    |                                    | Tyr5                                 | Tyr390                                                                  |

A red box indicates residues present at the interface of the AMA1 DI-DII-RON2L complex (PDB: 3zwz, <https://www.rcsb.org/structure/3ZWZ>) but not in the SBD1 immunogen, while a green box indicates residues present at the interface of the SBD1 immunogen but absent in the complex.

**Supplementary Table 3: Contact residues between RON2L and AMA1 residues for Insertion fusion immunogen 2.**

| Residues in RON2L | Residues in RON2L (Numbered according to PDB ID:3ZWZ) | Interface with AMA1 (PDB ID: 3ZWZ) | Residues in RON2L (Insertion fusion immunogen 2) | Interface with AMA1 (Insertion fusion immunogen 2) | Interface with AMA1 (Insertion fusion immunogen 2, numbered according to PDB ID:3ZWZ) |
|-------------------|-------------------------------------------------------|------------------------------------|--------------------------------------------------|----------------------------------------------------|---------------------------------------------------------------------------------------|
| Asp8              | Asp2028                                               | Leu131                             | Asp174                                           | Leu31                                              | Leu131                                                                                |
| Ile9              | Ile2029                                               | Val137                             | Ile175                                           | Val37                                              | Val137                                                                                |
| Gly10             | Gly2030                                               | Tyr142                             | Gly176                                           | Tyr42                                              | Tyr142                                                                                |
| Ala11             | Ala2031                                               | Arg143                             | Ala177                                           | Arg43                                              | Arg143                                                                                |
| Gly12             | Gly2032                                               | Val169                             | Gly178                                           | Val69                                              | Val169                                                                                |
| Pro13             | Pro2033                                               | Ala170                             | Pro179                                           | Ala70                                              | Ala170                                                                                |
| Val14             | Val2034                                               | Thr171                             | Val180                                           | Thr71                                              | Thr171                                                                                |
| Ala15             | Ala2035                                               | Gly172                             | Ala181                                           | Gly72                                              | Gly172                                                                                |
| Ser16             | Ser2036                                               | Gln174                             | Ser182                                           | Asn73                                              | Asn173                                                                                |
| Cys17             | Cys2037                                               | Leu176                             | Cys183                                           | Lys77                                              | Lys177                                                                                |
| Phe18             | Phe2038                                               | Phe183                             | Phe184                                           | Phe83                                              | Phe183                                                                                |
| Thr19             | Thr2039                                               | Pro184                             | Thr185                                           | Pro84                                              | Pro184                                                                                |
| Thr20             | Thr2040                                               | Pro185                             | Thr186                                           | Pro85                                              | Pro185                                                                                |
| Arg21             | Arg2041                                               | Thr186                             | Arg187                                           | Thr86                                              | Thr186                                                                                |
| Met22             | Met2042                                               | Glu187                             | Met188                                           | Glu87                                              | Glu187                                                                                |
| Ser23             | Ser2043                                               | Pro188                             | Ser189                                           | Pro88                                              | Pro188                                                                                |
| Pro24             | Pro2044                                               | Met190                             | Pro190                                           | Met90                                              | Met190                                                                                |
| Pro25             | Pro2045                                               | Phe201                             | Pro191                                           | Phe101                                             | Phe201                                                                                |
| Gln26             | Gln2046                                               | Tyr202                             | Gln192                                           | Tyr102                                             | Tyr202                                                                                |
| Gln27             | Gln2047                                               | Asn205                             | Gln193                                           | Asp104                                             | Asp204                                                                                |
| Ile28             | Ile2048                                               | Val208                             | Ile194                                           | Asn105                                             | Asn205                                                                                |
| Cys29             | Cys2049                                               | Arg219                             | Cys195                                           | Gly122                                             | Gly222                                                                                |
| Leu30             | Leu2050                                               | Gly222                             | Leu196                                           | Asn123                                             | Asn223                                                                                |
| Asn31             | Asn2051                                               | Asn223                             | Asn197                                           | Met124                                             | Met224                                                                                |
| Ser32             | Ser2052                                               | Met224                             | Ser198                                           | Ile125                                             | Ile225                                                                                |
| Val33             | Val2053                                               | Ile225                             | Val199                                           | Pro126                                             | Pro226                                                                                |
| Val34             | Val2054                                               | Pro226                             | Val200                                           | Asp127                                             | Asp227                                                                                |
| Asn35             | Asn2055                                               | Asp227                             | Asn201                                           | Asn128                                             | Asn228                                                                                |
|                   |                                                       | Asn228                             |                                                  | Lys130                                             | Lys230                                                                                |
|                   |                                                       | Ser232                             |                                                  | Ser132                                             | Ser232                                                                                |
|                   |                                                       | Tyr234                             |                                                  | Asn133                                             | Asn233                                                                                |
|                   |                                                       | Lys235                             |                                                  | Tyr134                                             | Tyr234                                                                                |
|                   |                                                       | Tyr236                             |                                                  | Lys135                                             | Lys235                                                                                |
|                   |                                                       | Tyr251                             |                                                  | Tyr136                                             | Tyr236                                                                                |
|                   |                                                       | Ile252                             |                                                  | Tyr151                                             | Tyr251                                                                                |
|                   |                                                       | Ala253                             |                                                  | Ile152                                             | Ile252                                                                                |
|                   |                                                       | Ala254                             |                                                  | Ala153                                             | Ala253                                                                                |
|                   |                                                       | Gln255                             |                                                  | Ala154                                             | Ala254                                                                                |
|                   |                                                       | Glu256                             |                                                  | Gln155                                             | Gln255                                                                                |
|                   |                                                       | Asn257                             |                                                  | Glu156                                             | Glu256                                                                                |
|                   |                                                       | Tyr262                             |                                                  | Asn157                                             | Asn257                                                                                |
|                   |                                                       | Asn271                             |                                                  | Phe213                                             | Phe276                                                                                |
|                   |                                                       | Phe276                             |                                                  | Gln286                                             | Gln349                                                                                |
|                   |                                                       | Gln349                             |                                                  | Pro287                                             | Pro350                                                                                |
|                   |                                                       | Pro350                             |                                                  |                                                    |                                                                                       |
|                   |                                                       | Tyr390                             |                                                  |                                                    |                                                                                       |

A red box indicates residues present at the interface of the AMA1 DI-DII-RON2L complex (PDB: 3zwz, <https://www.rcsb.org/structure/3ZWZ>) but not in the Insertion fusion immunogen 2, while a green box indicates residues present at the interface of the Insertion fusion immunogen 2 but absent in the complex.

**Supplementary Table 4: Contact residues between RON2L and AMA1 residues for Insertion fusion immunogen 3.**

| Residues in RON2L | Residues in RON2L (Numbered according to PDB ID:3ZWZ) | Interface with AMA1 (PDB ID: 3ZWZ) | Residues in RON2L (Insertion fusion immunogen 3) | Interface with AMA1 (Insertion fusion immunogen 3) | Interface with AMA1 (Insertion fusion immunogen 3, numbered according to PDB ID:3ZWZ) |
|-------------------|-------------------------------------------------------|------------------------------------|--------------------------------------------------|----------------------------------------------------|---------------------------------------------------------------------------------------|
| Thr3              | Thr2023                                               | Leu131                             | Thr177                                           | Leu31                                              | Leu131                                                                                |
| Gln4              | Gln2024                                               | Val137                             | Gln178                                           | Val37                                              | Val137                                                                                |
| Gln5              | Gln2025                                               | Thr140                             | Gln179                                           | Thr40                                              | Thr140                                                                                |
| Ala6              | Ala2026                                               | Gln141                             | Ala180                                           | Gln41                                              | Gln141                                                                                |
| Lys7              | Lys2027                                               | Tyr142                             | Lys181                                           | Tyr42                                              | Tyr142                                                                                |
| Asp8              | Asp2028                                               | Arg143                             | Asp182                                           | Arg43                                              | Arg143                                                                                |
| Ile9              | Ile2029                                               | Val169                             | Ile183                                           | Val69                                              | Val169                                                                                |
| Gly10             | Gly2030                                               | Ala170                             | Gly184                                           | Ala70                                              | Ala170                                                                                |
| Ala11             | Ala2031                                               | Thr171                             | Ala185                                           | Thr71                                              | Thr171                                                                                |
| Gly12             | Gly2032                                               | Gly172                             | Gly186                                           | Gly72                                              | Gly172                                                                                |
| Pro13             | Pro2033                                               | Gln174                             | Pro187                                           | Asn73                                              | Asn173                                                                                |
| Val14             | Val2034                                               | Leu176                             | Val188                                           | Lys77                                              | Lys177                                                                                |
| Ala15             | Ala2035                                               | Phe183                             | Ala189                                           | Phe83                                              | Phe183                                                                                |
| Ser16             | Ser2036                                               | Pro184                             | Ser190                                           | Pro84                                              | Pro184                                                                                |
| Cys17             | Cys2037                                               | Pro185                             | Cys191                                           | Pro85                                              | Pro185                                                                                |
| Phe18             | Phe2038                                               | Thr186                             | Phe192                                           | Thr86                                              | Thr186                                                                                |
| Thr19             | Thr2039                                               | Glu187                             | Thr193                                           | Glu87                                              | Glu187                                                                                |
| Thr20             | Thr2040                                               | Pro188                             | Thr194                                           | Pro88                                              | Pro188                                                                                |
| Arg21             | Arg2041                                               | Met190                             | Arg195                                           | Met90                                              | Met190                                                                                |
| Met22             | Met2042                                               | Phe201                             | Met196                                           | Phe101                                             | Phe201                                                                                |
| Ser23             | Ser2043                                               | Tyr202                             | Ser197                                           | Tyr102                                             | Tyr202                                                                                |
| Pro24             | Pro2044                                               | Asn205                             | Pro198                                           | Asp104                                             | Asp204                                                                                |
| Pro25             | Pro2045                                               | Val208                             | Pro199                                           | Asn105                                             | Asn205                                                                                |
| Gln26             | Gln2046                                               | Arg219                             | Gln200                                           | Gly122                                             | Gly222                                                                                |
| Gln27             | Gln2047                                               | Gly222                             | Gln201                                           | Asn123                                             | Asn223                                                                                |
| Ile28             | Ile2048                                               | Asn223                             | Ile202                                           | Met124                                             | Met224                                                                                |
| Cys29             | Cys2049                                               | Met224                             | Cys203                                           | Ile125                                             | Ile225                                                                                |
| Leu30             | Leu2050                                               | Ile225                             | Leu204                                           | Pro126                                             | Pro226                                                                                |
| Asn31             | Asn2051                                               | Pro226                             | Asn205                                           | Asp127                                             | Asp227                                                                                |
| Ser32             | Ser2052                                               | Asp227                             | Ser206                                           | Asn128                                             | Asn228                                                                                |
| Val33             | Val2053                                               | Asn228                             | Val207                                           | Lys130                                             | Lys230                                                                                |
| Val34             | Val2054                                               | Ser232                             | Val208                                           | Ser132                                             | Ser232                                                                                |
| Asn35             | Asn2055                                               | Tyr234                             | Asn209                                           | Asn133                                             | Asn233                                                                                |
|                   |                                                       | Lys235                             |                                                  | Tyr134                                             | Tyr234                                                                                |
|                   |                                                       | Tyr236                             |                                                  | Lys135                                             | Lys235                                                                                |
|                   |                                                       | Tyr251                             |                                                  | Tyr136                                             | Tyr236                                                                                |
|                   |                                                       | Ile252                             |                                                  | Tyr151                                             | Tyr251                                                                                |
|                   |                                                       | Ala253                             |                                                  | Ile152                                             | Ile252                                                                                |
|                   |                                                       | Ala254                             |                                                  | Ala153                                             | Ala253                                                                                |
|                   |                                                       | Gln255                             |                                                  | Ala154                                             | Ala254                                                                                |
|                   |                                                       | Glu256                             |                                                  | Gln155                                             | Gln255                                                                                |
|                   |                                                       | Asn257                             |                                                  | Glu156                                             | Glu256                                                                                |
|                   |                                                       | Tyr262                             |                                                  | Asn157                                             | Asn257                                                                                |
|                   |                                                       | Asn271                             |                                                  | Phe221                                             | Phe276                                                                                |
|                   |                                                       | Phe276                             |                                                  | Gln294                                             | Gln349                                                                                |
|                   |                                                       | Gln349                             |                                                  | Pro295                                             | Pro350                                                                                |
|                   |                                                       | Pro350                             |                                                  | Tyr300                                             | Tyr390                                                                                |
|                   |                                                       | Arg389                             |                                                  |                                                    |                                                                                       |
|                   |                                                       | Tyr390                             |                                                  |                                                    |                                                                                       |

A red box indicates residues present at the interface of the AMA1 DI-DII-RON2L complex (PDB: 3zwz, <https://www.rcsb.org/structure/3ZWZ>) but not in the fusion 3,

while a green box indicates residues present at the interface of the fusion 3 but absent in the complex.
